# Supplementary material for: Prospective Validation of a Prediction Model for the Diagnosis of Acute Pancreatitis
Source: PubMed Central journal article supplement (PMC11214112; doi:10.1001/jamanetworkopen.2024.19014), 2024-06-28
Supplement: jamanetwopen-e2419014-s001.pdf [file jamanetwopen-e2419014-s001.pdf]

## Data Sharing Statement

Jin. Prospective Validation of a Prediction Model for the Diagnosis of Acute Pancreatitis. *JAMA Netw Open*. Published June 28, 2024. doi:10.1001/jamanetworkopen.2024.19014

### Data

**Data available:** No
